# Supplementary material
Source: PubMed Central journal article supplement (PMC5453511)
Supplement: NIHMS854977-supplement-Supplementary_materials.pdf [file NIHMS854977-supplement-Supplementary_materials.pdf]

## SUPPLEMENTARY METHODS

### ***In Silico* Simulations**

The CPVT phenotype was modelled as described in our recent study using computationally reduced CASQ2 by modifying the Soltis-Saucerman model<sup>1</sup> and the Morotti-Grandi mouse cardiac cell model.<sup>2</sup>

We reduced the CASQ2 total protein ( $B_{max\_CASQ2}$ ) concentration by 25%, 50% and 75% in the following equation.

Calsequestrin buffer:

$$d \frac{[CASQ2]}{dt} = k_{on\_CASQ2} [Ca]_{SR} (B_{max\_CASQ2} - [CASQ2]) - k_{off\_CASQ2} [CASQ2]$$

| Buffer        | $B_{max\_CASQ2}$ [mM] | $K_{off\_CASQ2}$ ( $ms^{-1}$ ) | $K_{on\_CASQ2}$ ( $mM^{-1}ms^{-1}$ ) |
|---------------|-----------------------|--------------------------------|--------------------------------------|
| Calsequestrin | 2.7                   | 65                             | 100                                  |

### **Cellular and tissue simulations**

*Mouse ventricular myocyte model:* The  $I_{Na}$  channel was replaced in the Morotti-Grandi mouse cardiac cell model<sup>2</sup> with our published Markov model.<sup>3</sup> We then adjusted three transition rates for the mouse model to simulate the mouse  $I_{Na}$  kinetics:

| Transition rates |                   |
|------------------|-------------------|
| O→C1             | $\beta 13 * 0.45$ |
| O→IF             | $\alpha 2 * 0.45$ |
| O→IS             | $\alpha x * 0.45$ |

Virtual myocytes were paced using a -9.5 pA/pF current stimulus for 5 ms in single cells for 2 mins at 2Hz pacing frequency in the presence of 1.0 $\mu$ M ISO.

*Rabbit ventricular myocyte model:* The  $I_{Na}$  channel was replaced in the Soltis-Saucerman rabbit cardiac cell model.<sup>1</sup> Virtual whole cells and tissues were allowed

to “rest” without external stimuli for 10 minutes to establish initial conditions. Cells were then virtually paced using a -80 pA/pF current stimulus for 0.5 ms in single cells and -500 pA/pF stimulus for 2.0 ms in tissues. Cells were paced for 2 minutes in the presence of 1 $\mu$ M ISO. Parameters including upstroke velocity, action potential duration (APD), and the number of early and delayed after-depolarizations (DADs) were tracked over the course of each simulation.

One-dimensional tissue was simulated as a fibre of 165 cells (1.65cm)<sup>4</sup> with reflective boundary conditions. Transmural heterogeneity was incorporated into the tissue by a linear decrease to 25% maximal  $I_{to}$  conductance,<sup>5</sup> corresponding to a linear transition from epicardial to endocardial tissue <sup>6</sup> and an APD gradient of 205-224ms. The diffusion coefficient  $D_x$  was set to 0.002 cm<sup>2</sup>/ms to establish a conduction velocity of 61-73 cm/s (epicardium-endocardium in wild type conditions).<sup>7</sup>

## REFERENCES

1. Soltis AR, Saucerman JJ. Synergy between CaMKII substrates and beta-adrenergic signaling in regulation of cardiac myocyte Ca(2+) handling. *Biophys J* 2010;99:2038-2047.
2. Morotti S, Edwards AG, McCulloch AD, Bers DM, Grandi E. A novel computational model of mouse myocyte electrophysiology to assess the synergy between Na<sup>+</sup> loading and CaMKII. *J Physiol* 2014;592:1181-1197.
3. Moreno JD, Yang PC, Bankston JR, Grandi E, Bers DM, Kass RS, Clancy CE. Ranolazine for congenital and acquired late INa-linked arrhythmias: in silico pharmacological screening. *Circ Res* 2013;113:e50-61.
4. Glukhov AV, Fedorov VV, Lou Q, Ravikumar VK, Kalish PW, Schuessler RB, Moazami N, Efimov IR. Transmural dispersion of repolarization in failing and nonfailing human ventricle. *Circ Res* 2010;106:981-991.
5. Myles RC, Bernus O, Burton FL, Cobbe SM, Smith GL. Effect of activation sequence on transmural patterns of repolarization and action potential duration in rabbit ventricular myocardium. *Am J Physiol Heart Circ Physiol* 2010;299:H1812-1822.
6. Fedida D, Giles WR. Regional variations in action potentials and transient outward current in myocytes isolated from rabbit left ventricle. *J Physiol* 1991;442:191-209.
7. Brugada J, Boersma L, Kirchhof C, Allessie M. [Anisotropy and reentrant ventricular tachycardia: experimental model in the isolated rabbit heart]. *Rev Esp Cardiol* 1990;43:558-568.
